# Supplementary material for: Enriched expression of genes associated with autism spectrum disorders in human inhibitory neurons
Source: PubMed Central journal article supplement (PMC5802446; doi:10.1038/s41398-017-0058-6), 2018-01-10

**A****Cluster Dendrogram**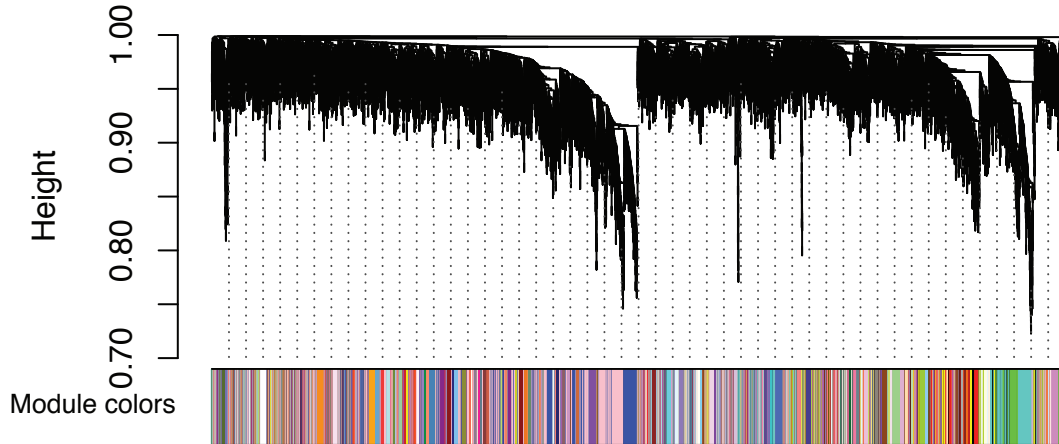**B**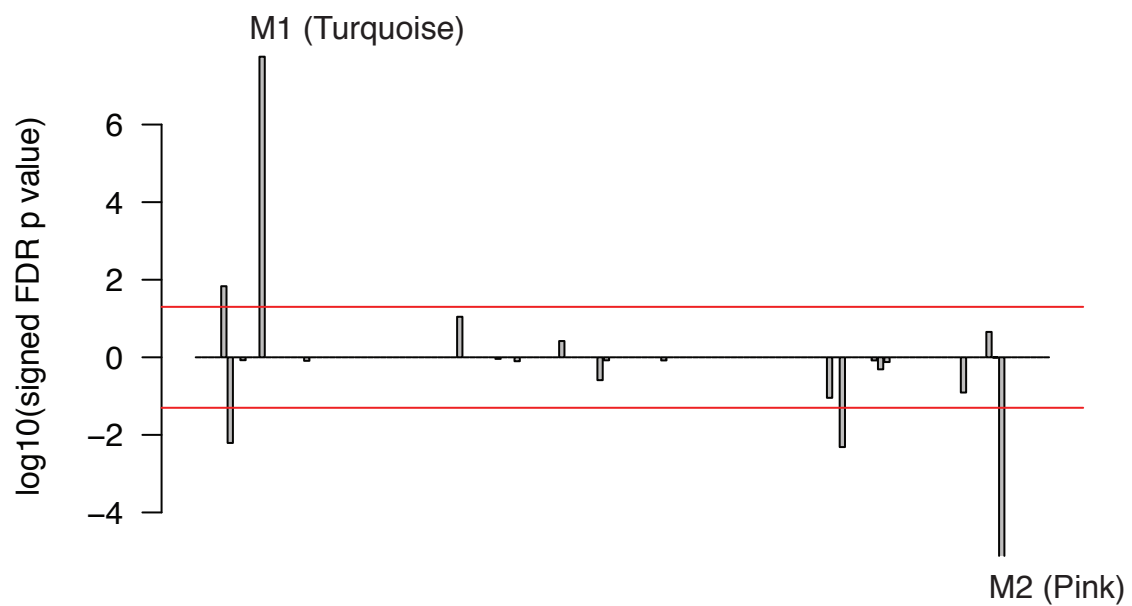**C**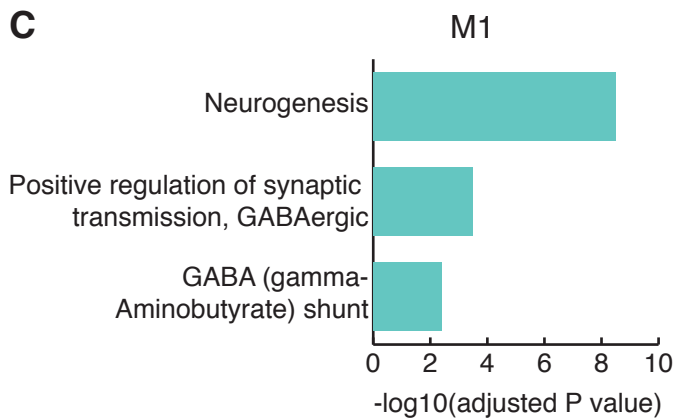**D**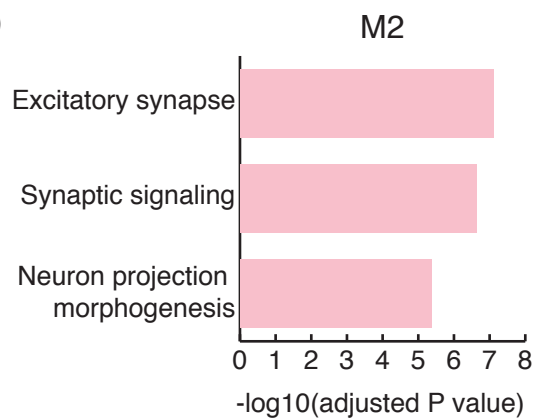

Supplement: 41398_2017_58_MOESM3_ESM.pdf [file 41398_2017_58_MOESM3_ESM.pdf]
